# Supplementary material
Source: publisher figshare collection journal article supplement (https://sage.figshare.com/ndownloader/files/16621019)
Supplement: Supplementary file 1 [file 16621019]

Supporting Information for

**Study on Crystallization Structure and Thermal Behavior of iPP  
Induced by a New Liquid Crystal Nucleator**

**Xiaoxu Xu<sup>\*1</sup>, Zhengzheng Hao<sup>2</sup>, Chao Fan<sup>2</sup>, Qifan Chen<sup>1</sup>, Yanhua Lu<sup>1,3</sup>, Yaoqing Wu<sup>1</sup>**

*<sup>1</sup>School of Chemical Engineering, Eastern Liaoning University, Dandong, 118001, P. R. China*

*<sup>2</sup>Center for Molecular Science and Engineering, College of Science, Northeastern University, Shenyang 110819,*

*P. R. China;*

*<sup>3</sup>Key Laboratory of Functional Textile Materials, Liaoning Province, Dandong, 118001, P. R. China*

## Additional Data

### Dispersibility of the polymer LCPs-P in the iPP

Liquid crystal to isotropic phase transition temperature of the polymer LCPs-P was 320.7°C, and the melting temperature of the  $\alpha$ -crystal disappeared completely at 170°C, so we chose the blend temperature of 185 °C to investigate the dispersion effect of the LCPs-P in the iPP.

POM result showed that the clear liquid crystal properties or texture of the iPP blend sample with the LCPs-P content below 1.0% could not be observed at 185 °C. When the content of the LCPs-P was more than 1.5%, the liquid crystal properties could be observed at 185 °C. Figure S1 shows the iPP blend sample with 2.0% LCPs-P content. When heated to 185 °C, the iPP melted completely, but liquid crystal texture still existed, so the distribution of liquid crystal showed that the LCPs-P was more evenly dispersed in the iPP.

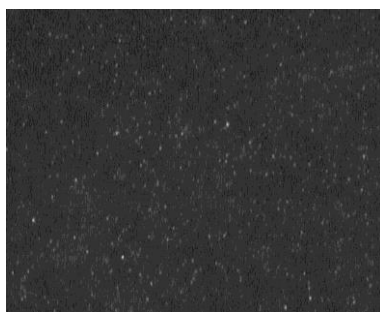

Figure S1. The iPP blend sample with 2.0% LCPs-P content
